# Supplementary material for: FooDOxS: a database of oxidized sterols content in foods
Source: Royal Society of Chemistry journal article supplement (doi:10.1039/d4fo00678j), 2024-01-01
Supplement: d4fo00678j1.pdf [file d4fo00678j1.pdf]

**Table S1.** List of compounds included in the FooDOxS database, including common name, abbreviations used in the database, IUPAC systematic name and EPA CompTox ID<sup>31</sup>. N/A = CompTox entry not available.

| Name                                               | Abbreviation                  | ACD/IUPAC name                                               | CompTox ID      |
|----------------------------------------------------|-------------------------------|--------------------------------------------------------------|-----------------|
| Cholesterol                                        | cholesterol                   | (3 $\beta$ )-Cholest-5-en-3-ol                               | DTXSID3022401   |
| 7-ketocholesterol                                  | 7-keto                        | (3 $\beta$ )-3-Hydroxycholest-5-en-7-one                     | DTXSID901033744 |
| 25-hydroxycholesterol                              | 25-OH                         | (3 $\beta$ )-Cholest-5-ene-3,25-diol                         | DTXSID5044023   |
| 7 $\alpha$ -hydroxycholesterol                     | 7 $\alpha$ -OH                | (3 $\beta$ ,7 $\alpha$ )-Cholest-5-ene-3,7-diol              | DTXSID40903965  |
| 7 $\beta$ -hydroxycholesterol                      | 7 $\beta$ -OH                 | (3 $\beta$ ,7 $\beta$ )-Cholest-5-ene-3,7-diol               | DTXSID60862207  |
| 5 $\alpha$ ,6 $\alpha$ -epoxycholesterol           | 5 $\alpha$ ,6 $\alpha$ -epoxy | (3 $\beta$ ,5 $\alpha$ ,6 $\alpha$ )-5,6-Epoxycholestan-3-ol | DTXSID80921305  |
| 5 $\beta$ ,6 $\beta$ -epoxycholesterol             | 5 $\beta$ ,6 $\beta$ -epoxy   | (3 $\beta$ ,5 $\beta$ ,6 $\beta$ )-5,6-Epoxycholestan-3-ol   | DTXSID501314152 |
| 6-ketocholestanol                                  | 6-keto                        | (3 $\beta$ ,5 $\alpha$ )-3-Hydroxycholestan-6-one            | DTXSID10922441  |
| 20-hydroxycholesterol                              | 20-OH                         | (3 $\beta$ )-Cholest-5-ene-3,20-diol                         | DTXSID70862096  |
| Cholestane-3,5,6-triol                             | triol                         | (3 $\beta$ ,5 $\alpha$ ,6 $\beta$ )-Cholestane-3,5,6-triol   | DTXSID70862612  |
| 4 $\beta$ -hydroxycholesterol                      | 4 $\beta$ -OH                 | (3 $\beta$ ,4 $\beta$ )-Cholest-5-ene-3,4-diol               | N/A             |
| 27-hydroxycholesterol                              | 27-OH                         | (25R)-cholest-5-ene-3 $\beta$ ,26-diol                       | DTXSID40864941  |
| 22-ketocholesterol                                 | 22-keto                       | (3 $\beta$ )-3-Hydroxycholest-5-en-22-one                    | DTXSID70940904  |
| 19-hydroxycholesterol                              | 19-OH                         | (3 $\beta$ )-Cholest-5-ene-3,19-diol                         | N/A             |
| 3 $\beta$ ,5-dihydroxy-5 $\alpha$ -cholesten-6-one | cholesten-6-one               | (3 $\beta$ ,5 $\alpha$ )-3,5-Dihydroxycholestan-6-one        | DTXSID80926658  |
| 4-cholesten-3-one                                  | cholesten-3-one               | Cholest-4-en-3-one                                           | DTXSID90872379  |
| 4-cholesten-3,6-dione                              | cholesten-3,6-dione           | Cholest-4-ene-3,6-dione                                      | DTXSID20913305  |
| 3,5-cholestadien-7-one                             | cholestadien-7-one            | (20R)-Cholesta-3,5-dien-7-one                                | DTXSID10972143  |
| 3-keto-5-cholestene                                | 3-keto-5-cholestene           | Cholest-5-en-3-one                                           | DTXSID40208841  |
| $\beta$ -sitosterol                                | $\beta$ -sitosterol           | (3 $\beta$ )-Stigmast-5-en-3-ol                              | DTXSID5022481   |
| Campesterol                                        | Campesterol                   | (3 $\beta$ ,24R)-Ergost-5-en-3-ol                            | DTXSID801009891 |
| $\Delta$ 7-avenasterol                             | Avenasterol                   | (3 $\beta$ ,5 $\alpha$ ,24Z)-Stigmasta-7,24(28)-dien-3-ol    | DTXSID10177858  |
| $\Delta$ 5-avenasterol                             | $\Delta$ 5-avenasterol        | (24Z)-Stigmasta-5,24(28)-dien-3-ol                           | N/A             |
| Brassicasterol                                     | brassicasterol                | (3 $\beta$ ,22E)-Ergosta-5,22-dien-3-ol                      | DTXSID80197124  |
| Campestanol                                        | campestanol                   | (3 $\beta$ ,5 $\alpha$ ,24R)-Ergostan-3-ol                   | DTXSID3040988   |
| Stigmasterol                                       | stigmasterol                  | (3 $\beta$ ,20R,22E,24S)-Stigmasta-5,22-dien-3-ol            | DTXSID801015733 |
| Stigmastanol                                       | stigmastanol                  | (3 $\beta$ )-Stigmastan-3-ol                                 | DTXSID8051835   |
| Fucosterol                                         | fucosterol                    | (3 $\beta$ ,20R,24E)-Stigmasta-5,24(28)-dien-3-ol            | DTXSID701033229 |
| Desmosterol                                        | desmosterol                   | (3 $\beta$ )-Cholesta-5,24-dien-3-ol                         | DTXSID10878676  |

|                                              |                                              |                                                                         |     |
|----------------------------------------------|----------------------------------------------|-------------------------------------------------------------------------|-----|
| 6 $\beta$ -hydroxybrassicastanol             | 6 $\beta$ -OH-brassicastanol                 | N/A                                                                     | N/A |
| 6 $\beta$ -hydroxycampesterol                | 6 $\beta$ -OH-campesterol                    | N/A                                                                     | N/A |
| 6 $\beta$ -hydroxycampestanol                | 6 $\beta$ -OH-campestanol                    | (3 $\beta$ ,5 $\alpha$ ,6 $\alpha$ ,24R)-Ergostane-3,6-diol             | N/A |
| 6 $\alpha$ -hydroxysitostanol                | 6 $\alpha$ -OH-sitostanol                    | 5 $\alpha$ -Stigmast-3 $\beta$ ,6 $\alpha$ -diol                        | N/A |
| 7 $\alpha$ -hydroxycampesterol               | 7 $\alpha$ -OH-campesterol                   | (3 $\beta$ ,7 $\alpha$ ,24R)-Ergost-5-ene-3,7-diol                      | N/A |
| 7 $\alpha$ -hydroxystigmasterol              | 7 $\alpha$ -OH-stigmasterol                  | (3 $\beta$ ,7 $\alpha$ ,22E)-Stigmasta-5,22-diene-3,7-diol              | N/A |
| 7 $\alpha$ -hydroxysitosterol                | 7 $\alpha$ -OH-sitosterol                    | (3 $\beta$ ,7 $\alpha$ )-Stigmast-5-ene-3,7-diol                        | N/A |
| 7 $\beta$ -hydroxycampesterol                | 7 $\beta$ -OH-campesterol                    | (3 $\beta$ ,7 $\beta$ ,24R)-Ergost-5-ene-3,7-diol                       | N/A |
| 7 $\beta$ -hydroxystigmasterol               | 7 $\beta$ -OH-stigmasterol                   | (3 $\beta$ ,7 $\beta$ ,22E)-Stigmasta-5,22-diene-3,7-diol               | N/A |
| 7 $\beta$ -hydroxysitosterol                 | 7 $\beta$ -OH-sitosterol                     | (3 $\beta$ ,7 $\beta$ )-Stigmast-5-ene-3,7-diol                         | N/A |
| 24-ethylcholest-4-ene-6 $\beta$ -ol-3-one    | 24-ethylcholest-4-ene-6 $\beta$ -ol-3-one    | 6 $\beta$ -Hydroxystigmast-4-en-3-one                                   | N/A |
| 24-ethylcholest-4-ene-6 $\alpha$ -ol-3-one   | 24-ethylcholest-4-ene-6 $\alpha$ -ol-3-one   | 6 $\alpha$ -Hydroxystigmast-4-en-3-one                                  | N/A |
| 24-hydroxystigmasterol                       | 24-OH-stigmasterol                           | (3 $\beta$ ,22E)-Stigmasta-5,22-diene-3,24-diol                         | N/A |
| 24-hydroxycampesterol                        | 24-OH-campesterol                            | (3 $\beta$ ,22S,24R)-Ergost-5-ene-3,22-diol                             | N/A |
| 24-hydroxysitosterol                         | 24-OH-sitosterol                             | (3b,24R)-24-Ethylcholest-5-ene-3,24-diol                                | N/A |
| 25-hydroxysitosterol                         | 25-OH-sitosterol                             | (3b,24R)-24-Ethylcholest-5-ene-3,25-diol                                | N/A |
| Campesterol-5 $\beta$ ,6 $\beta$ -epoxide    | campesterol-5 $\beta$ ,6 $\beta$ -epoxide    | (24R)-5 $\beta$ ,6 $\beta$ -Epoxy-24-methylcholestan-3 $\beta$ -ol      | N/A |
| Campesterol-5 $\alpha$ ,6 $\alpha$ -epoxide  | campesterol-5 $\alpha$ ,6 $\alpha$ -epoxide  | (24R)-5 $\alpha$ ,6 $\alpha$ -Epoxy-24-methylcholestan-3 $\beta$ -ol    | N/A |
| Stigmasterol-5 $\alpha$ ,6 $\alpha$ -epoxide | stigmasterol-5 $\alpha$ ,6 $\alpha$ -epoxide | (24S)-5 $\alpha$ ,6 $\alpha$ -Epoxy-24-ethylcholest-22-en-3 $\beta$ -ol | N/A |
| Stigmasterol-5 $\beta$ ,6 $\beta$ -epoxide   | stigmasterol-5 $\beta$ ,6 $\beta$ -epoxide   | (24S)-5 $\beta$ ,6 $\beta$ -Epoxy-24-ethylcholest-22-en-3 $\beta$ -ol   | N/A |
| Sitosterol-5 $\alpha$ ,6 $\alpha$ -epoxide   | sitosterol-5 $\alpha$ ,6 $\alpha$ -epoxide   | (24R)-5 $\alpha$ ,6 $\alpha$ -Epoxy-24-ethylcholestan-3 $\beta$ -ol     | N/A |
| Sitosterol-5 $\beta$ ,6 $\beta$ -epoxide     | sitosterol-5 $\beta$ ,6 $\beta$ -epoxide     | (24R)-5 $\beta$ ,6 $\beta$ -Epoxy-24-ethylcholestan-3 $\beta$ -ol       | N/A |
| Campestanetriol                              | campestanetriol                              | (24R)-Methylcholestan-3 $\beta$ ,5 $\alpha$ ,6 $\beta$ -triol           | N/A |
| Stigmastetriol                               | stigmastetriol                               | (24S)-Ethylcholest-22-en-3 $\beta$ ,5 $\alpha$ ,6 $\beta$ -triol        | N/A |
| Sitostanetriol                               | sitostanetriol                               | (24R)-Ethylcholestan-3 $\beta$ ,5 $\alpha$ ,6 $\beta$ -triol            | N/A |
| Brassicastanetriol                           | brassicastanetriol                           | (24S)-Methylcholest-22-en-3 $\beta$ ,5 $\alpha$ ,6 $\beta$ -triol       | N/A |
| 7-ketobrassicasterol                         | 7-ketobrassicasterol                         | (24S)-Methylcholest-5,22-dien-3 $\beta$ -ol-7-one                       | N/A |
| 7-ketocampesterol                            | 7-ketocampesterol                            | (24R)-Methylcholest-5-en-3 $\beta$ -ol-7-one                            | N/A |
| 7-ketostigmasterol                           | 7-ketostigmasterol                           | (24S)-Ethylcholest-5,22-dien-3 $\beta$ -ol-7-one                        | N/A |
| 7-ketositosterol                             | 7-ketositosterol                             | (24R)-Ethylcholest-5-en-3 $\beta$ -ol-7-one                             | N/A |
| 6-ketositosterol                             | 6-ketositosterol                             | (24R)-Ethylcholest-5-en-3 $\beta$ -ol-6-one                             | N/A |

**Table S2.** Distribution of analytical techniques for determining DOxS in papers included in the FooDOxS database.

| <b>Method</b>                                     | <b>%</b>    |
|---------------------------------------------------|-------------|
| Gas-chromatography (FID <sup>a</sup> detector)    | 39.5        |
| Gas-chromatography (MS <sup>b</sup> detector)     | 49.1        |
| <i>Total Gas-chromatography</i>                   | <b>88.6</b> |
| Liquid-chromatography (DAD <sup>c</sup> detector) | 8.8         |
| Liquid-chromatography (MS detector)               | 1.8         |
| <i>Total Liquid-chromatography</i>                | <b>10.5</b> |
| <sup>1</sup> H-NMR <sup>d</sup>                   | 0.9         |

<sup>a</sup>Flame Ionization Detector, <sup>b</sup>Mass-Spectrometer, <sup>c</sup>Diode-Array Detector, <sup>d</sup>Nuclear Magnetic Resonance
